# Supplementary material for: Patients with chronic lymphocytic leukemia and complex karyotype show an adverse outcome even in absence of TP53/ATM FISH deletions
Source: PubMed Central journal article supplement (PMC5589581; doi:10.18632/oncotarget.17350), 2017-04-21
Supplement: oncotarget-08-54297-s001.pdf [file oncotarget-08-54297-s001.pdf]

## Patients with chronic lymphocytic leukemia and complex karyotype show an adverse outcome even in absence of *TP53/ATM* FISH deletions

### Supplementary Materials

**Supplementary Table 1: Baseline characteristics of 1045 CLL and MBL patients at diagnosis and last follow-up**

| Patients characteristics                            |                |
|-----------------------------------------------------|----------------|
| Median age at diagnosis (range)                     | 68 (27–94)     |
| Male                                                | 632 (60.5%)    |
| Diagnosis                                           |                |
| MBL                                                 | 224 (21.4%)    |
| CLL                                                 | 821 (78.6%)    |
| Binet stage ( <i>n</i> = 802)                       |                |
| A                                                   | 685 (85.4%)    |
| B                                                   | 89 (11.1%)     |
| C                                                   | 28 (3.5%)      |
| Lymphadenopathy ( <i>n</i> = 1021)                  | 316 (31.0%)    |
| Splenomegaly ( <i>n</i> = 1014)                     | 65 (6.4%)      |
| Hepatomegaly ( <i>n</i> = 1032)                     | 38 (3.7%)      |
| Absolute white blood cell count ( $\times 10^9/L$ ) | 15 (3–177)     |
| Absolut lymphocyte count ( $\times 10^9/L$ )        | 10 (1–170)     |
| Hemoglobin (g/dL)                                   | 14 (5–18)      |
| Platelets ( $\times 10^9/L$ )                       | 195 (10–555)   |
| Lactate dehydrogenase (IU/L)                        | 310 (81–1548)  |
| Beta-2 Microglobulin (mg/L)                         | 2.1 (1.0–19.0) |
| ZAP-70 positive ( <i>n</i> = 501)*                  | 170 (31.3%)    |
| CD38 positive ( <i>n</i> = 836)*                    | 174 (20.8%)    |
| Unmutated <i>IGHV</i> ( <i>n</i> = 98)              | 33 (33.7%)     |
| FISH                                                |                |
| 13q deletion                                        | 475 (45.4%)    |
| Trisomy 12                                          | 190 (18.2%)    |
| 11q deletion ( <i>ATM</i> )                         | 93 (8.9%)      |
| 17p deletion ( <i>TP53</i> )                        | 90 (8.6%)      |
| Median follow-up (months)                           | 46 (0–272)     |
| Therapy during follow-up                            | 316 (30.2%)    |
| Number of treatments                                | 1 (1–8)        |
| Died during follow-up                               | 167 (16.0%)    |

\*Positivity was considered when ZAP-70 > 20% and CD38 > 30%. Values are given as median (range) or number (%). Hemoglobin is expressed as mean (range).

**Supplementary Table 2: Most frequently administered therapies in first-line treatment**

| <b>Therapy</b>                                       | <b>Frequency</b> |
|------------------------------------------------------|------------------|
| Chlorambucil                                         | 31.9%            |
| Rituximab + fludarabine + cyclophosphamide           | 18.3%            |
| Fludarabine + cyclophosphamide ( $\pm$ mitoxantrone) | 8.7%             |
| Fludarabine                                          | 4.6%             |
| R-CHOP                                               | 3.2%             |
| Bendamustine + Rituximab                             | 2.3%             |

R-CHOP: *rituximab + cyclophosphamide + Adriamycin + vincristine + prednisone*.

**Supplementary Table 3: Karyotype result and *ATM/TP53* status from the 99 patients with CK.**  
See Supplementary\_Table\_3
